# Supplementary material
Source: Springer Nature journal article supplement (https://www.springermedizin.de/resource/supplementary/12889_2011_3747_MOESM1_ESM.pdf/9491692)
Supplement: MOESM1 [file 9491692]

# Employability Interventions

## New Innovative Interventions

## Existing Best Practices

Primary care

Work in general practice (UMC St Radboud)

Secondary/  
specialist care

Care for Work (Vumc, EMGO+)

Musculoskeletal and mental health complaints (Second Care / Care for Companies)

Musculoskeletal health complaints (Health & Motion)

Interaction employee & employer

Guidance to excel in return to work (MU)

Second Care / Care for Companies

Health & Motion
